# Supplementary material
Source: publisher figshare collection journal article supplement (https://tandf.figshare.com/ndownloader/files/31080346)
Supplement: Supplementary file 1 [file 31080346]

**Videos – Supplementary Material**

1. video 1 - long latency to start crossing the white V-shaped bottom

<https://drive.google.com/file/d/163E2By3LhFriaNq9PgALZ32TtT2y8I2e/view?usp=sharing>

1. video 2 - erratic swimming patterns (thigmotaxis, burst swimming, turning and returning) while crossing the white V-shaped bottom

<https://drive.google.com/file/d/1bId5ydLZptkcq-fFSj4BRER3bpEBV3FZ/view?usp=sharing>
